# Supplementary material for: IKBKE regulates cell proliferation and epithelial–mesenchymal transition of human malignant glioma via the Hippo pathway
Source: PubMed Central journal article supplement (PMC5564784; doi:10.18632/oncotarget.17738), 2017-05-10
Supplement: oncotarget-08-49502-s001.pdf [file oncotarget-08-49502-s001.pdf]

## IKBKE regulates cell proliferation and epithelial–mesenchymal transition of human malignant glioma via the Hippo pathway

### Supplementary Materials

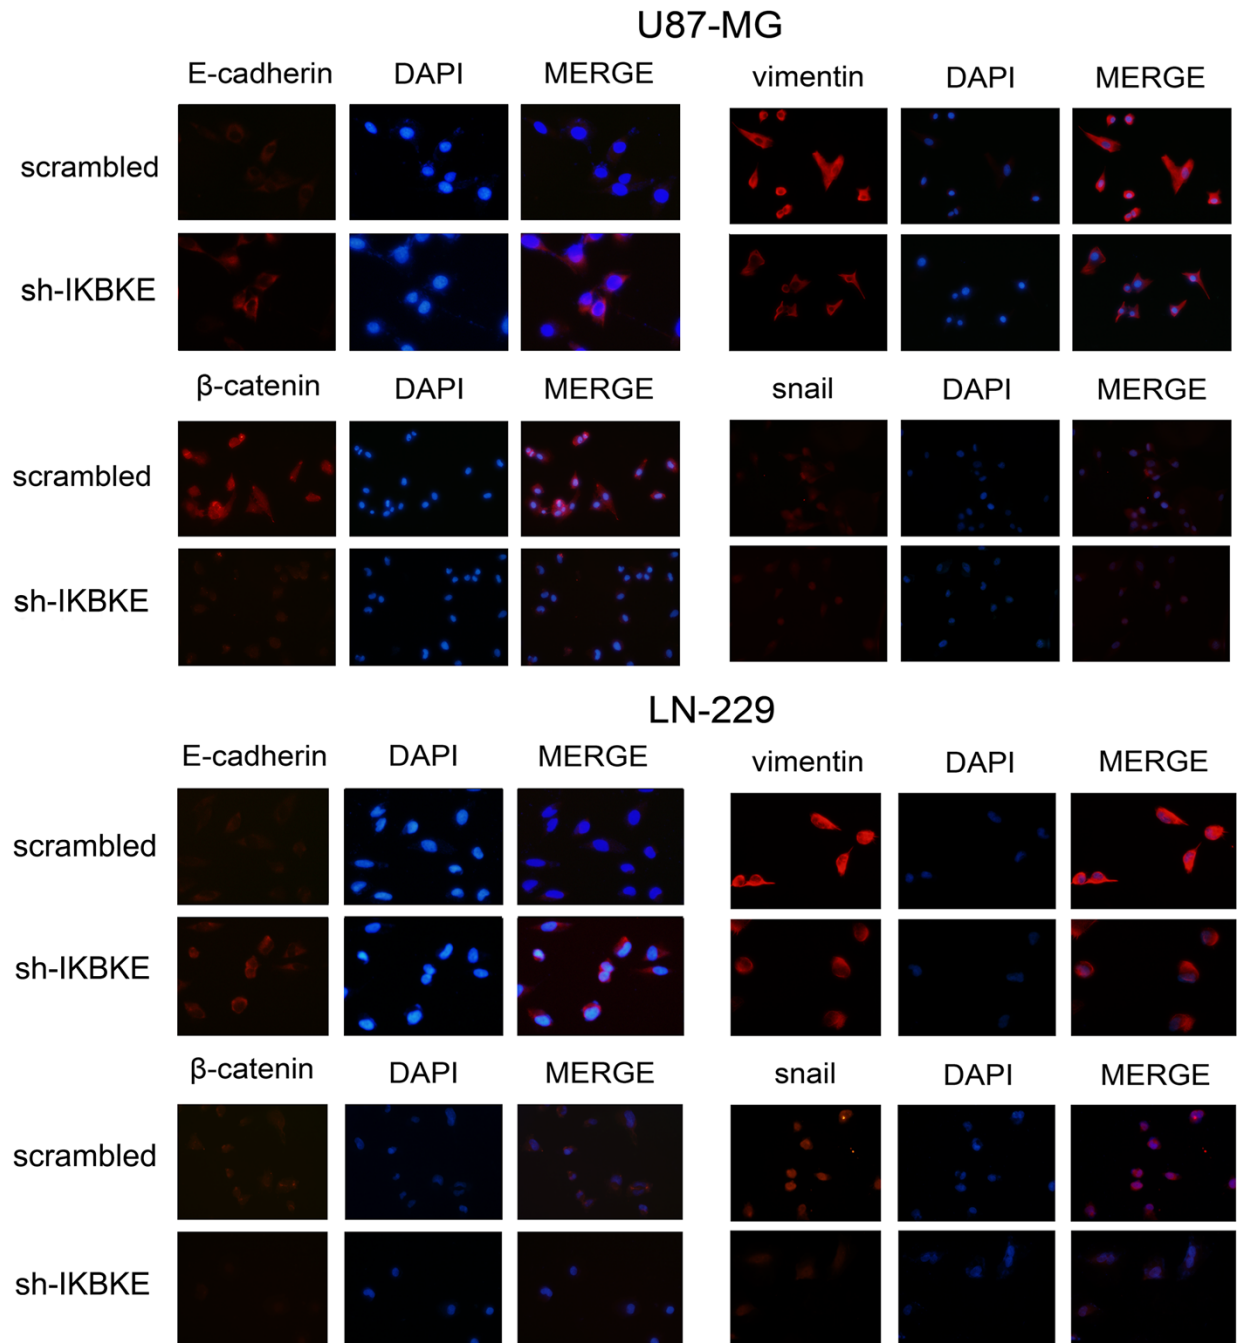

Supplemental Figure 1: The immunofluorescence analysis of E-cadherin, vimentin,  $\beta$ -catenin and snail after cells transfected with IKBKE-shRNA.
